# Supplementary material for: Disparities in Receipt of National Comprehensive Cancer Network Guideline-Adherent Care and Outcomes among Women with Triple-Negative Breast Cancer by Race/Ethnicity, Socioeconomic Status, and Insurance Type
Source: MDPI journal article supplement (doi:10.3390/cancers15235586), 2023-11-26
Supplement: s1 [file s1]

**Table S1.** Algorithm defining NCCN-adherent treatment for TNBC [16].

| Tumor Characteristics |            | Adherent Treatment                                                                 |                             |                             |              |
|-----------------------|------------|------------------------------------------------------------------------------------|-----------------------------|-----------------------------|--------------|
| Lymph Node            | Tumor Size | Surgery and Radiation Therapy                                                      | Sentinel Lymph Node Surgery | Axillary Lymph Node Surgery | Chemotherapy |
| N0                    | ≤10 mm     | Stage I, II, IIIA with N1<br>Total mastectomy or BCS + radiation                   | Yes                         |                             |              |
| N0                    | >10 mm     | Total mastectomy or BCS + radiation                                                | Yes                         |                             | Yes          |
| N1mi                  | ≤10 mm     | Total mastectomy or BCS + radiation                                                | Yes                         |                             |              |
| N1mi                  | >10 mm     | Total mastectomy or BCS + radiation                                                | Yes                         |                             | Yes          |
| Positive              | Any        | Total mastectomy or BCS + radiation                                                | Yes                         |                             | Yes          |
| Any                   | Any        | Stage IIIA with N2+, IIIB, IIIC<br>Total mastectomy + radiation or BCS + radiation |                             | Yes                         | Yes          |
| Any                   | Any        | Stage IV                                                                           |                             |                             | Yes          |

Abbreviations: BCS, breast-conserving surgery; mi, micro-metastasis.

**Table S2.** Distribution of patient characteristics by race/ethnicity.

| Non-Hispanic White       |      | Non-Hispanic Black |      | Hispanic |      | Asian |      | P-value <sup>a</sup> |
|--------------------------|------|--------------------|------|----------|------|-------|------|----------------------|
| N                        | (%)  | N                  | (%)  | N        | (%)  | N     | (%)  |                      |
| 8930                     | 53.6 | 2085               | 12.5 | 3880     | 23.3 | 1752  | 10.5 |                      |
| Age at diagnosis (years) |      |                    |      |          |      |       |      |                      |
| 18-44                    | 1424 | 15.9               | 382  | 18.3     | 1243 | 32.0  | 428  | 24.4                 |
| 45-54                    | 2177 | 24.4               | 627  | 30.1     | 1214 | 31.3  | 499  | 28.5                 |
| 55-64                    | 2643 | 29.6               | 604  | 29.0     | 843  | 21.7  | 439  | 25.1                 |
| 65-79                    | 2686 | 30.1               | 472  | 22.6     | 580  | 14.9  | 386  | 22.0                 |
| Year of Diagnosis        |      |                    |      |          |      |       |      |                      |
| 2004-2009                | 5595 | 62.7               | 1267 | 60.8     | 2208 | 56.9  | 1010 | 57.6                 |
| 2010+                    | 3335 | 37.3               | 818  | 39.2     | 1672 | 43.1  | 742  | 42.4                 |
| Insurance                |      |                    |      |          |      |       |      |                      |
| Manage Care              | 4564 | 51.1               | 1194 | 57.3     | 1829 | 47.1  | 921  | 52.6                 |
| Medicare                 | 1664 | 18.6               | 358  | 17.2     | 410  | 10.6  | 223  | 12.7                 |

|                                          |      |      |      |      |      |      |      |      |         |
|------------------------------------------|------|------|------|------|------|------|------|------|---------|
| Medicaid                                 | 544  | 6.1  | 274  | 13.1 | 1009 | 26.0 | 245  | 14.0 |         |
| Other Insurance                          | 1856 | 20.8 | 186  | 8.9  | 485  | 12.5 | 311  | 17.8 |         |
| Not insured or unknown                   | 302  | 3.4  | 73   | 3.5  | 147  | 3.8  | 52   | 3.0  |         |
| Neighborhood socioeconomic status. (SES) |      |      |      |      |      |      |      |      | <0.0001 |
| Lowest SES                               | 692  | 7.7  | 529  | 25.4 | 1193 | 30.7 | 144  | 8.2  |         |
| Lower-middle SES                         | 1341 | 15.0 | 537  | 25.8 | 1008 | 26.0 | 264  | 15.1 |         |
| Middle SES                               | 1874 | 21.0 | 465  | 22.3 | 777  | 20.0 | 334  | 19.1 |         |
| Higher-middle SES                        | 2356 | 26.4 | 375  | 18.0 | 574  | 14.8 | 457  | 26.1 |         |
| Highest SES                              | 2667 | 29.9 | 179  | 8.6  | 328  | 8.5  | 553  | 31.6 |         |
| Marital status                           |      |      |      |      |      |      |      |      | <0.0001 |
| Not married                              | 3481 | 39.0 | 1300 | 62.4 | 1610 | 41.5 | 538  | 30.7 |         |
| Married                                  | 5449 | 61.0 | 785  | 37.6 | 2270 | 58.5 | 1214 | 69.3 |         |
| Tumor stage                              |      |      |      |      |      |      |      |      | <0.0001 |
| I                                        | 3377 | 37.8 | 614  | 29.4 | 1092 | 28.1 | 588  | 33.6 |         |
| II                                       | 3961 | 44.4 | 970  | 46.5 | 1914 | 49.3 | 859  | 49.0 |         |
| III                                      | 1264 | 14.2 | 379  | 18.2 | 714  | 18.4 | 245  | 14.0 |         |
| IV                                       | 328  | 3.7  | 122  | 5.9  | 160  | 4.1  | 60   | 3.4  |         |
| Received adherent care                   |      |      |      |      |      |      |      |      | <0.0001 |
| No                                       | 5893 | 66.0 | 1480 | 71.0 | 2705 | 69.7 | 1179 | 67.3 |         |
| Yes                                      | 3037 | 34.0 | 605  | 29.0 | 1175 | 30.3 | 573  | 32.7 |         |

(A) Stage I

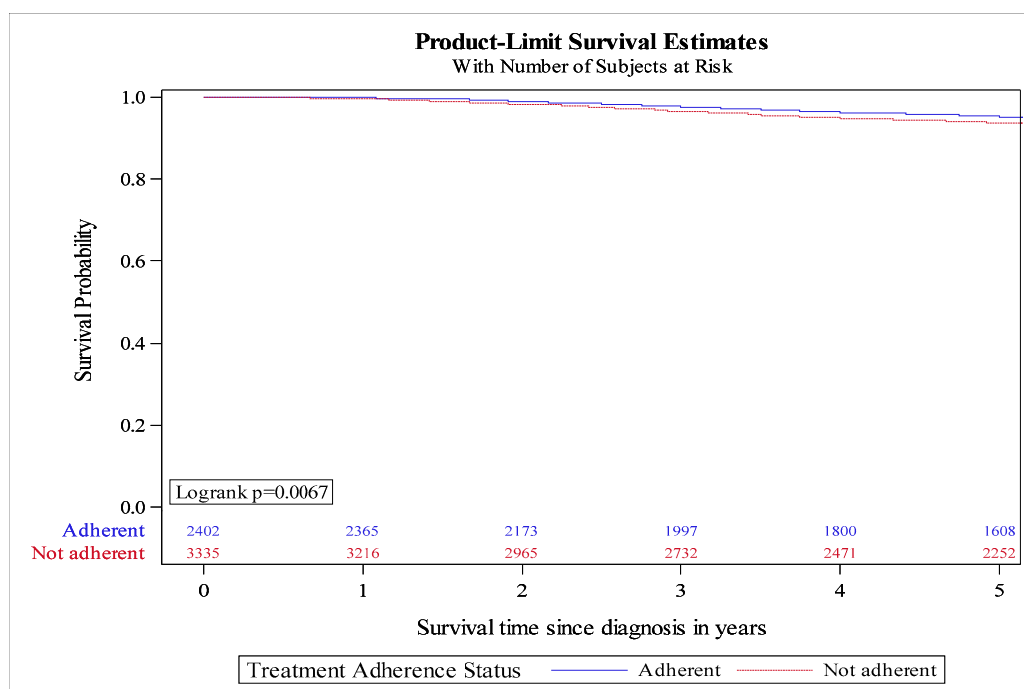

(B) Stage II

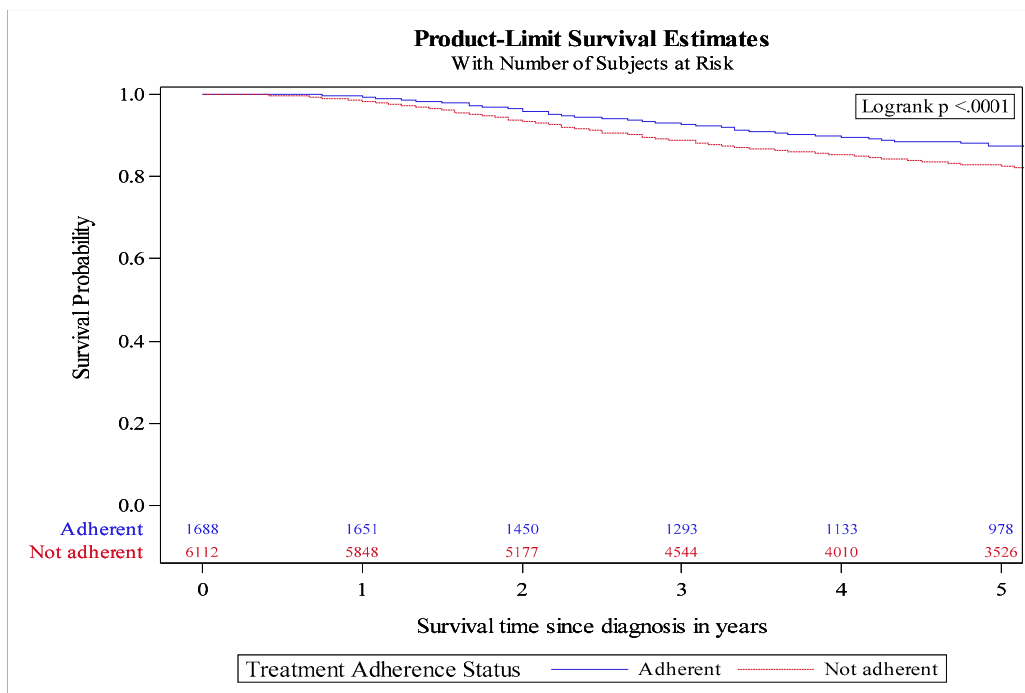

(C) Stage III

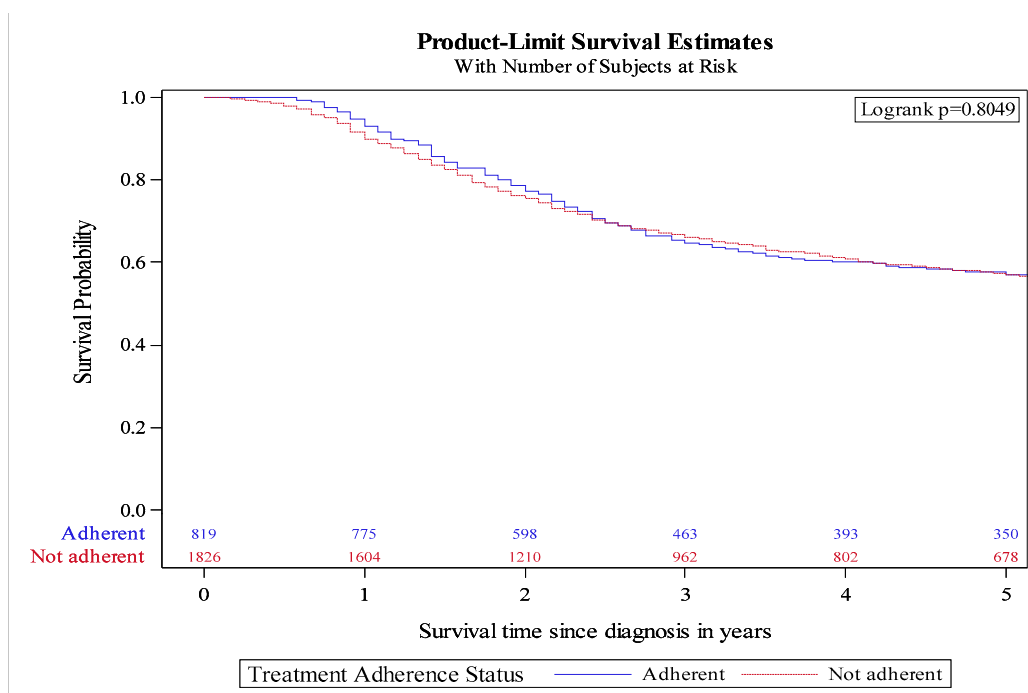

(D) Stage IV

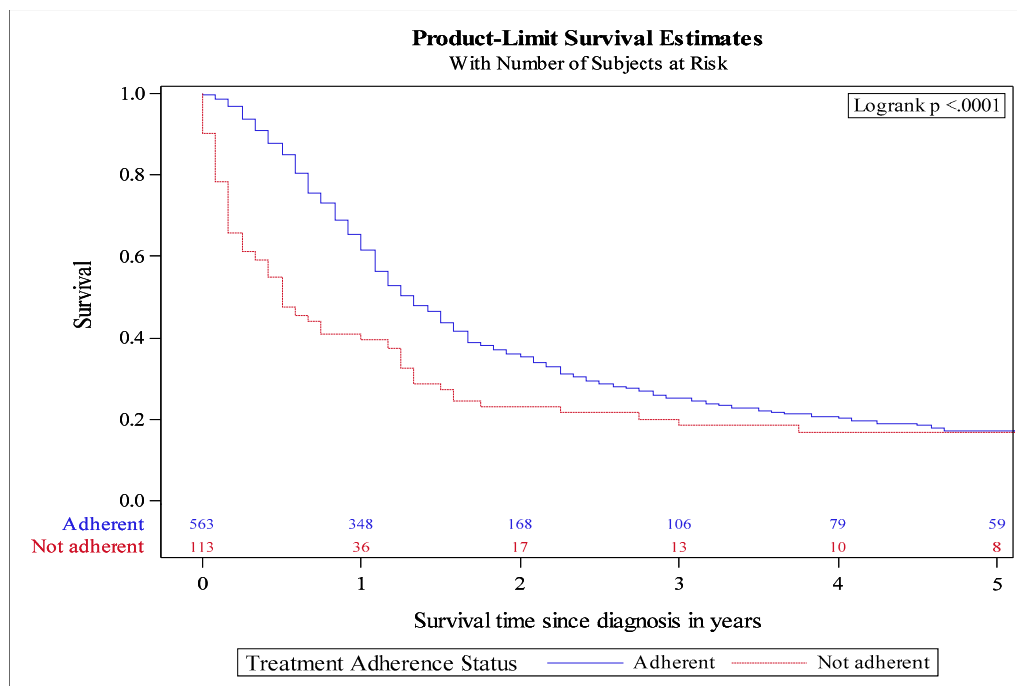

**Figure S1.** Kaplan-Meier disease-specific survival graph by treatment adherent status.
